# Supplementary material
Source: MDPI journal article supplement (https://www.mdpi.com/2220-9964/6/10/297)
Supplement: s1 [file s1]

## Sheet: Table S1
RISK DETECTOR
Fertilizer
Level 1	Level 2	Level 3	Level 4	Level 5
21.8715	43.3913	33.9997	46.916	55.9775
Sig. t test: 0.05
	1	2	3	4	5
1
2	Y
3	Y	N
4	Y	N	Y
5	Y	N	Y	N
Manure
Level 1	Level2	Level 3	Level 4
29.4612	49.9939	46.6324	52.909
Sig. t test: 0.05
	1	2	3	4
1
2	Y
3	Y	N
4	Y	N	N
Cropland
Level 1	Level 2	Level 3	Level 4	Level 5
30.8509	39.7032	43.681	47.7724	53.6379
Sig. t test: 0.05
	1	2	3	4	5
1
2	N
3	N	N
4	Y	N	N
5	Y	N	N	N
Precipitation
Level 1	Level 2	Level 3	Level 4	Level 5
46.4283	53.5812	48.1042	22.8178	19.1585
Sig. t test: 0.05
	1	2	3	4	5
1
2	N
3	N	N
4	Y	Y	Y
5	Y	Y	Y	N
Permeability
Level 1	Level 2	Level 3	Level 4	Level 5
33.91	37.8251	45.4988	39.9372	61.4769
Sig. t test: 0.05
	1	2	3	4	5
1
2	N
3	N	N
4	N	N	N
5	Y	Y	N	N
Clay
Level 1	Level 2	Level 3	Level 4	Level 5
48.0654	46.7008	26.9732	36.4488	34.2743
Sig. t test: 0.05
	1	2	3	4	5
1
2	N
3	Y	Y
4	N	N	N
5	N	N	N	N
Recharge Rate
Level 1	Level 2	Level 3	Level 4	Level 5
38.6307	40.7894	45.5165	50.7865	40.5092
Sig. t test: 0.05
	1	2	3	4	5
1
2	N
3	N	N
4	N	N	N
5	N	N	N	N
Elevation
Level 1	Level 2	Level 3
33.1002	54.0821	28.1309
Sig. t test: 0.05
	1	2	3
1
2	Y
3	N	Y
Slope
Level 1	Level 2	Level 3
43.257	35.5486	18.8889
Sig. t test: 0.05
	1	2	3
1
2	N
3	Y	Y
Dissolved Oxygen
Level 1	Level 2	Level 3	Level 4	Level 5
32.5845	37.1447	38.4903	48.7985	56.1833
Sig. t test: 0.05
	1	2	3	4	5
1
2	N
3	N	N
4	Y	N	N
5	Y	Y	Y	N
Iron (Fe)
Level 1	Level 2	Level 3	Level 4
43.7707	35.9443	15.0583	26.8952
Sig. t test: 0.05
	1	2	3	4
1
2	N
3	Y	N
4	N	N	N
Mangenese
Level 1	Level 2	Level 3
41.2519	40.7461	41.9789
Sig. t test: 0.05
	1	2	3
1
2	N
3	N	N

## Sheet: Table S2
	Interaction Detector
		Slope	Recharge Rate	Precipitation	Permeability	Mangenese	Manure	Fertilizer	Iron(Fe)	Elevation	Dissolved Oxygen	Cropland	Clay
	Slope
	Recharge Rate	0.116666
	Precipitation	0.358061	0.36937
	Permeability	0.155263	0.216777	0.460152
	Mangenese	0.0443045	0.0327214	0.311298	0.180407
	Manure	0.249322	0.255237	0.396011	0.406644	0.230814
	Fertilizer	0.24998	0.352101	0.384203	0.368042	0.260753	0.358868
	Iron(Fe)	0.111433	0.108176	0.292107	0.178502	0.0793045	0.219131	0.295487
	Elevation	0.239367	0.27702	0.417631	0.322968	0.213245	0.344415	0.347162	0.240678
	Dissolved Oxygen	0.147385	0.273598	0.439119	0.342707	0.170119	0.327344	0.3989	0.143929	0.265151
	Cropland	0.115627	0.197077	0.380727	0.363003	0.150602	0.234564	0.335579	0.176614	0.244961	0.265643
	Clay	0.145192	0.215923	0.368881	0.240602	0.129242	0.338711	0.311531	0.185509	0.342361	0.326164	0.261168

## Sheet: Table S3
	Ecological Detector
	Sat Diff Sig:0.05
		Slope	Recharge Rate	Precipitation	Permeability	Manganese	Manure	fertilizer	Iron	Elevation	Dissolved Oxygen	Cropland	Clay
	Slope
	Recharge Rate	N
	Precipitation	Y	Y
	Permeability	N	N	N
	Managense	N	N	N	N
	Manure	N	N	N	N	N
	Fertilizer	N	N	N	N	N	N
	Iron	N	N	N	N	N	N	N
	Elevation	N	N	N	N	N	N	N	N
	Dissolved Oxygen	N	N	N	N	N	N	N	N	N
	Cropland	N	N	N	N	N	N	N	N	N	N
	Clay	N	N	N	N	N	N	N	N	N	N	N
